# Supplementary material for: Crystal structure of the putative cell-wall lipoglycan biosynthesis protein LmcA from Mycobacterium smegmatis
Source: PubMed Central journal article supplement (PMC8972800; doi:10.1107/s2059798322001772), 2022-03-11
Supplement: d-78-00494-sup1.pdf [file d-78-00494-sup1.pdf]

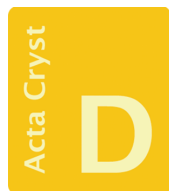

STRUCTURAL  
BIOLOGY

**Volume 78 (2022)**

**Supporting information for article:**

**Crystal structure of the putative cell-wall lipoglycan biosynthesis protein LmcA from *Mycobacterium smegmatis***

**Onisha Patel, Rajini Brammananth, Weiwen Dai, Santosh Panjekar, Ross L. Coppel, Isabelle S. Lucet and Paul K. Crellin**

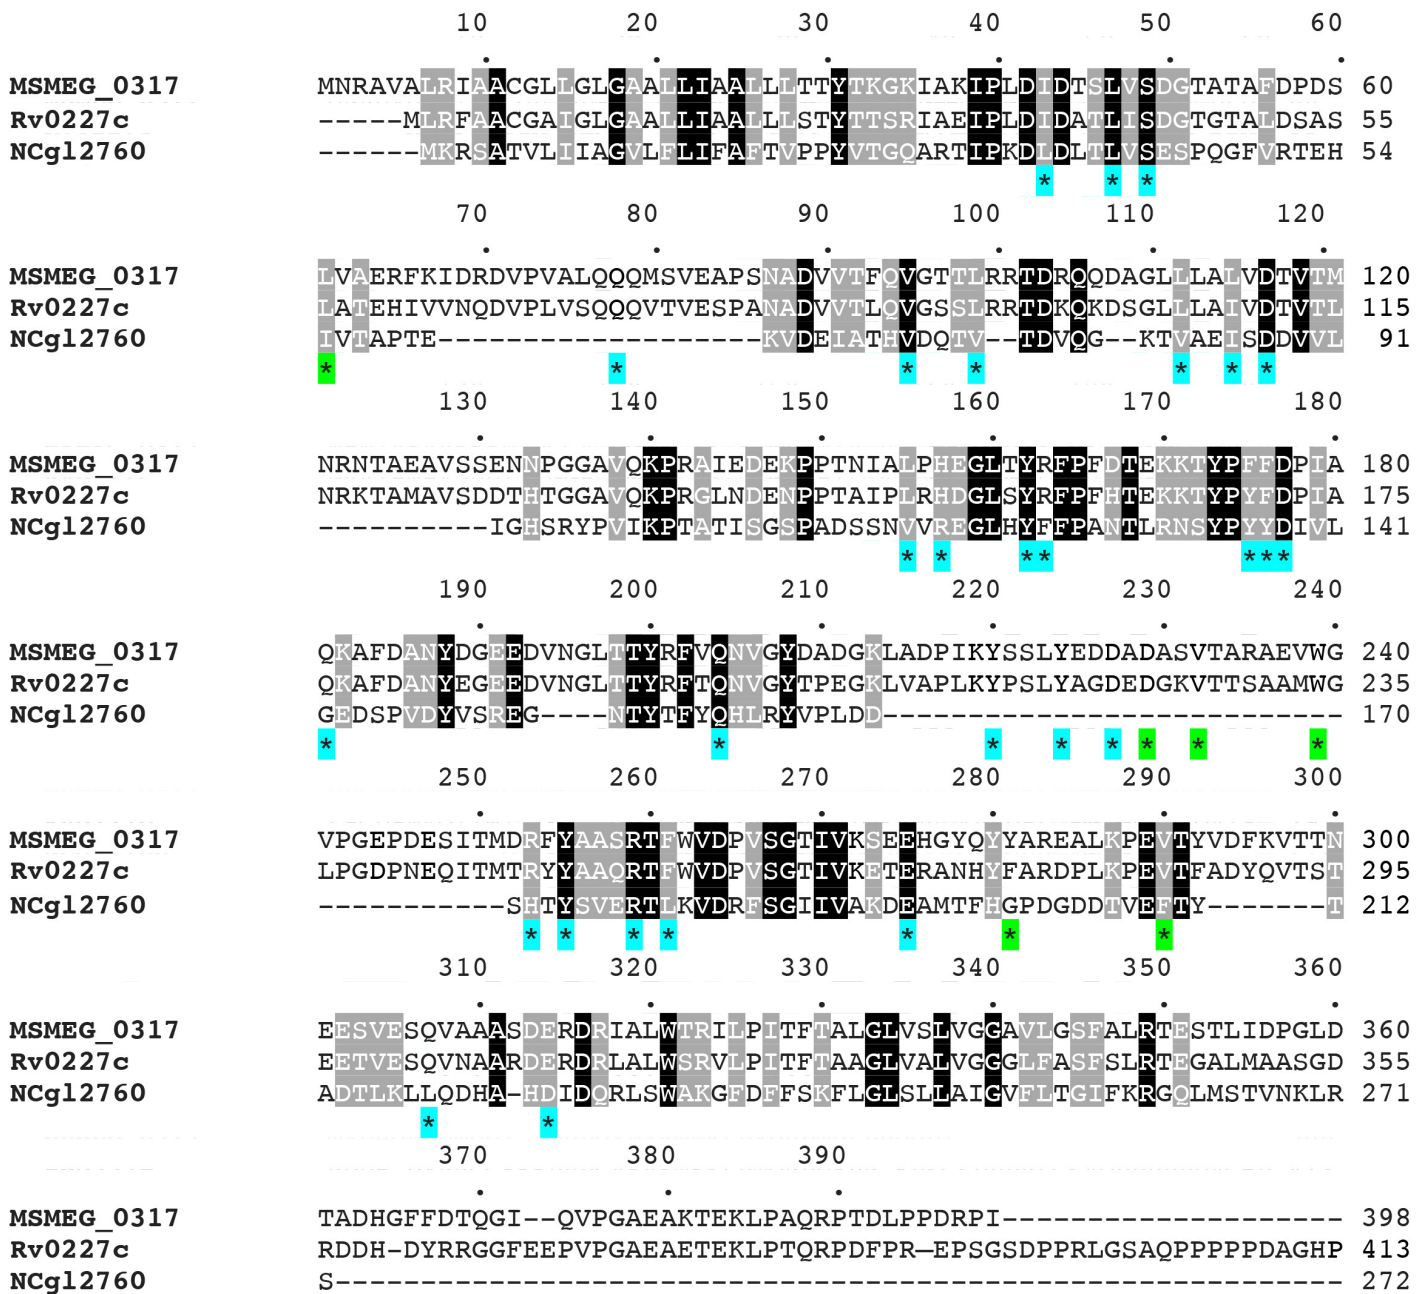

**Fig. S1.** Sequence alignment of *M. smegmatis* MSMEG\_0317 with *M. tuberculosis* Rv0227c and *C. glutamicum* NCg12760. MSMEG\_0317 display 65% sequence identity with *M. tuberculosis* Rv0227c and 24% with NCg12760. Identical residues are shaded black while similar residues are shaded grey. The black dots represent sequence numbering. Blue asterisks denote MSMEG\_0317 residues in cavity 1 that are conserved in Rv0227c, and green asterisks denote MSMEG\_0317 residues in cavity 2 that are conserved in Rv0227c.

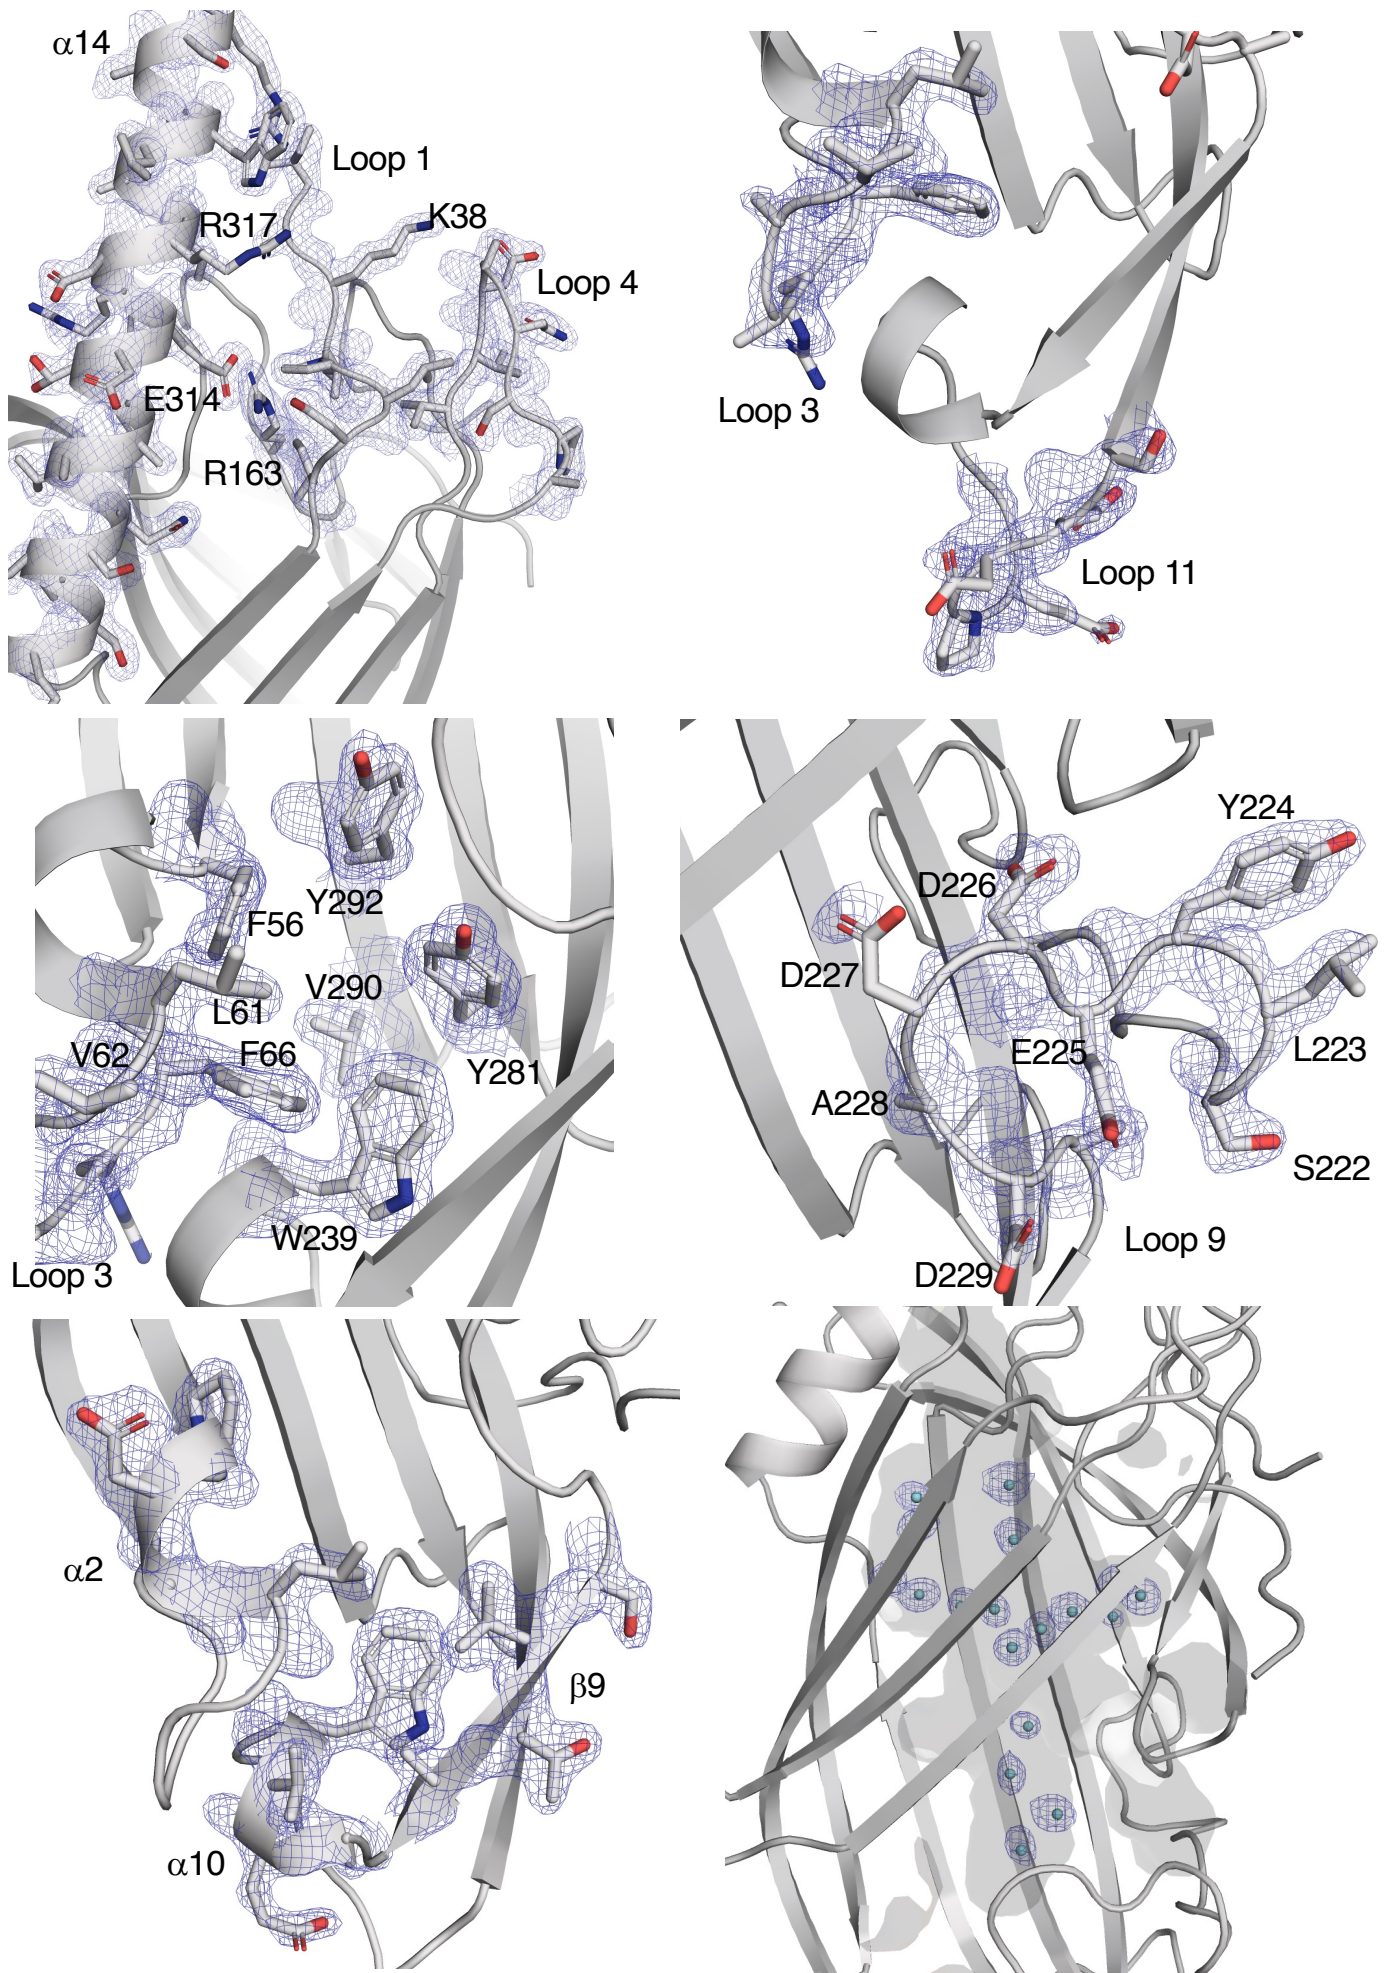

**Fig. S2.** 2Fo-Fc map of some amino acid side chains and water molecules (blue spheres) inside the cavity (shown in shade of grey) in the MSMEG\_0317 $\Delta$  crystal structure after refinement and model building contoured at  $1\sigma$ .



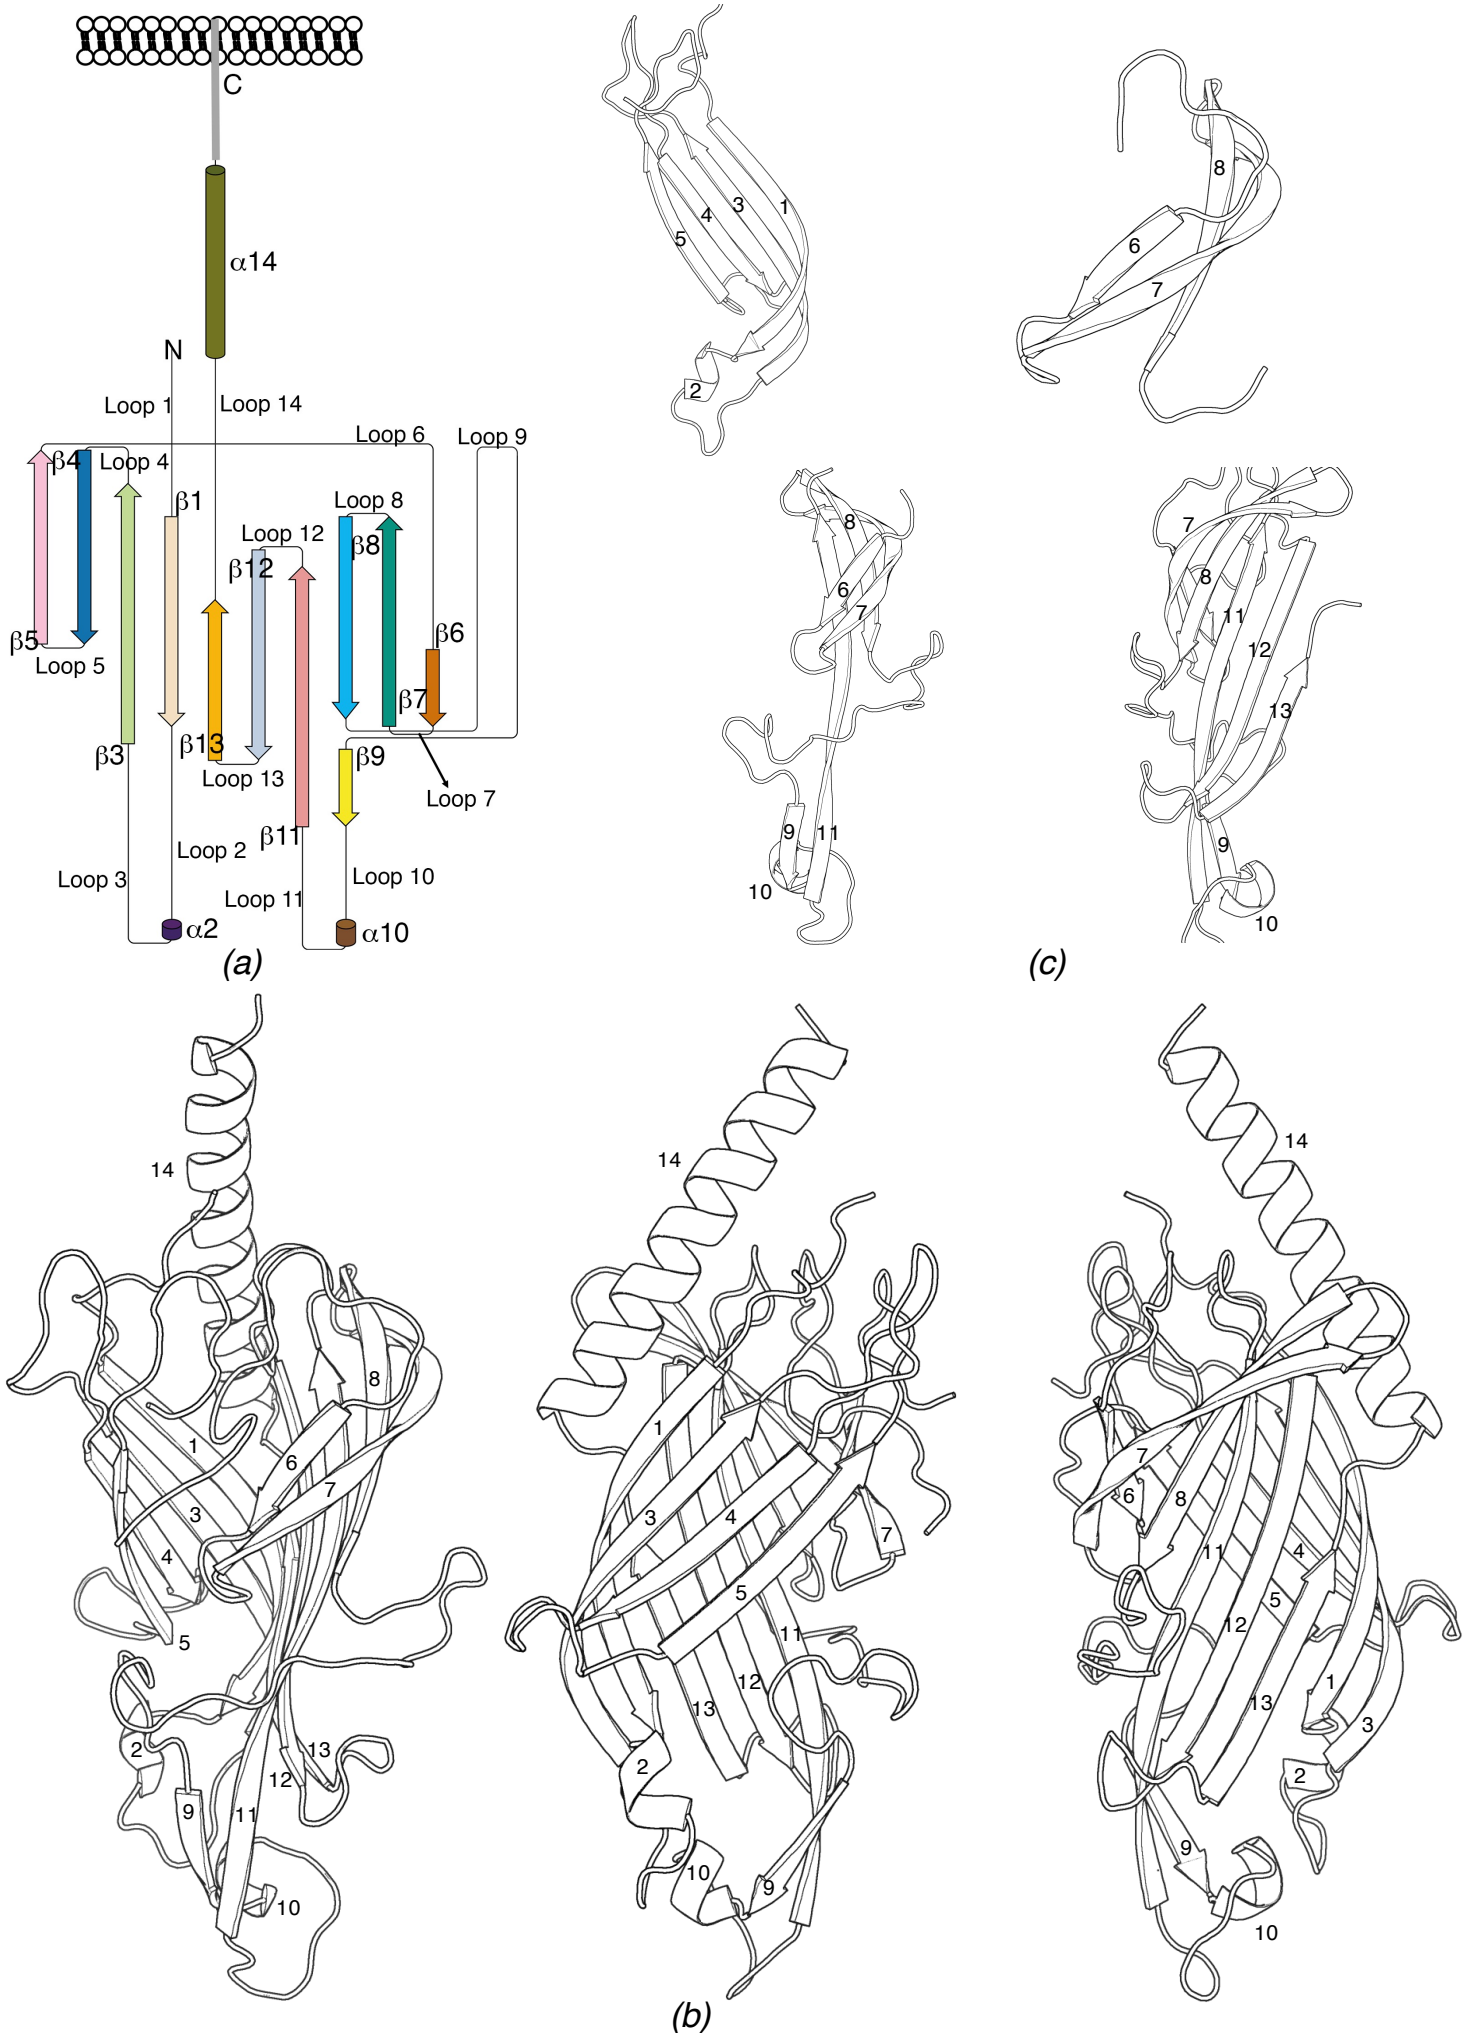

**Fig. S3.** (a) Topology diagram of MSMEG\_0317 $\Delta$  generated using Pro-origami. (b) A black and white trace of the overall structure highlighting secondary elements (shown in numbers) and their arrangement. (c) A close up of secondary elements to highlight their arrangement relative to each other.



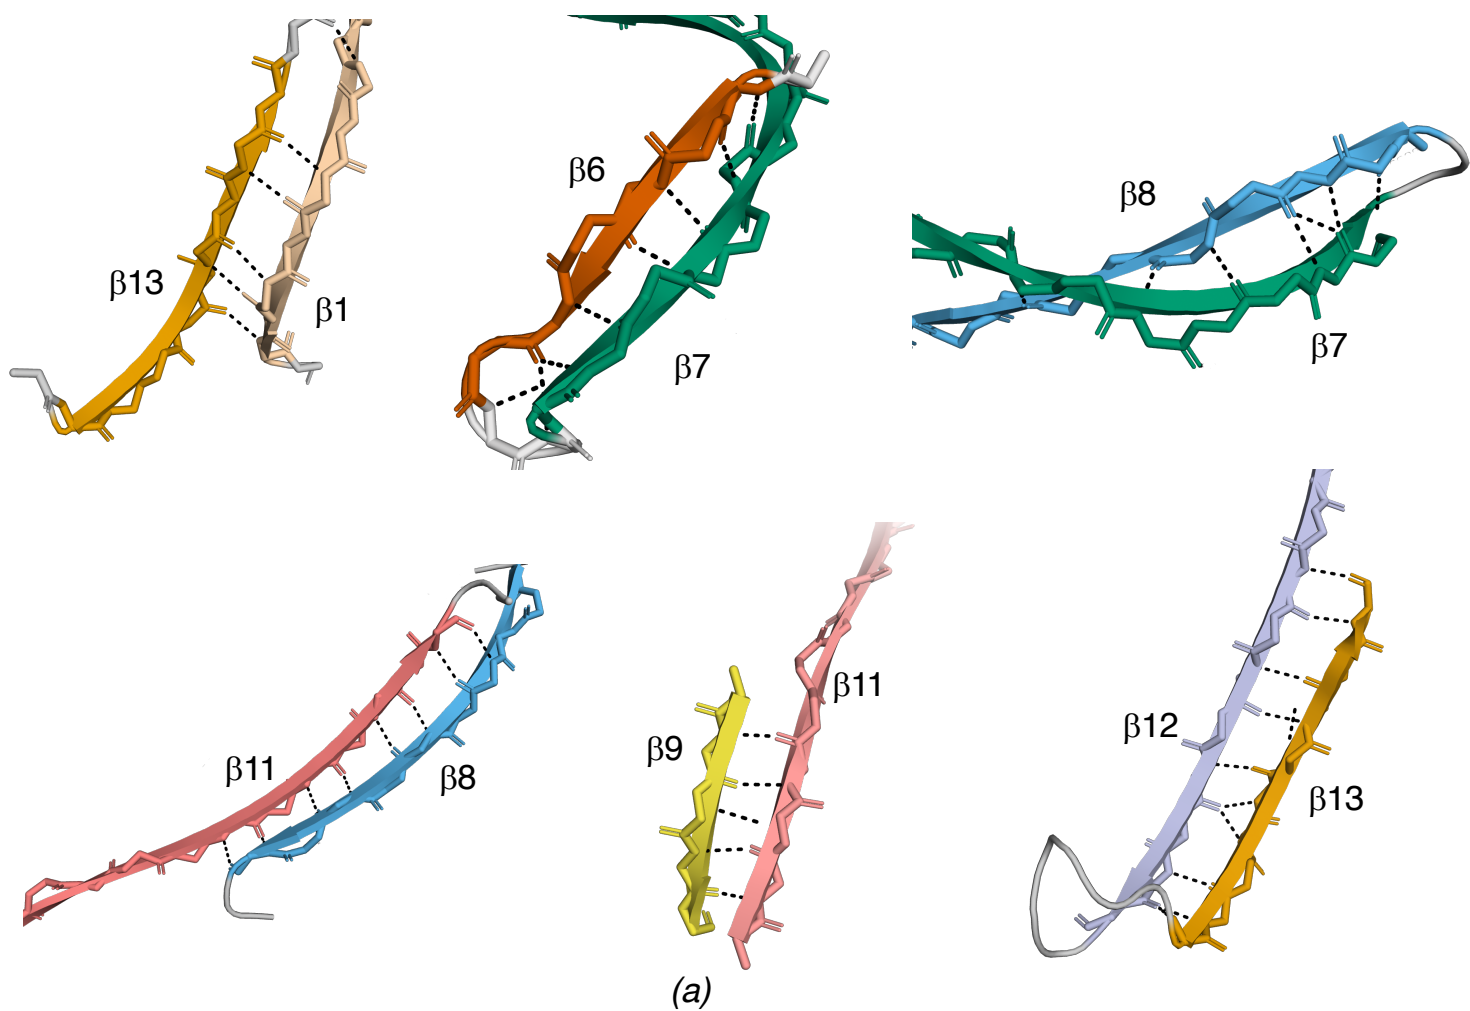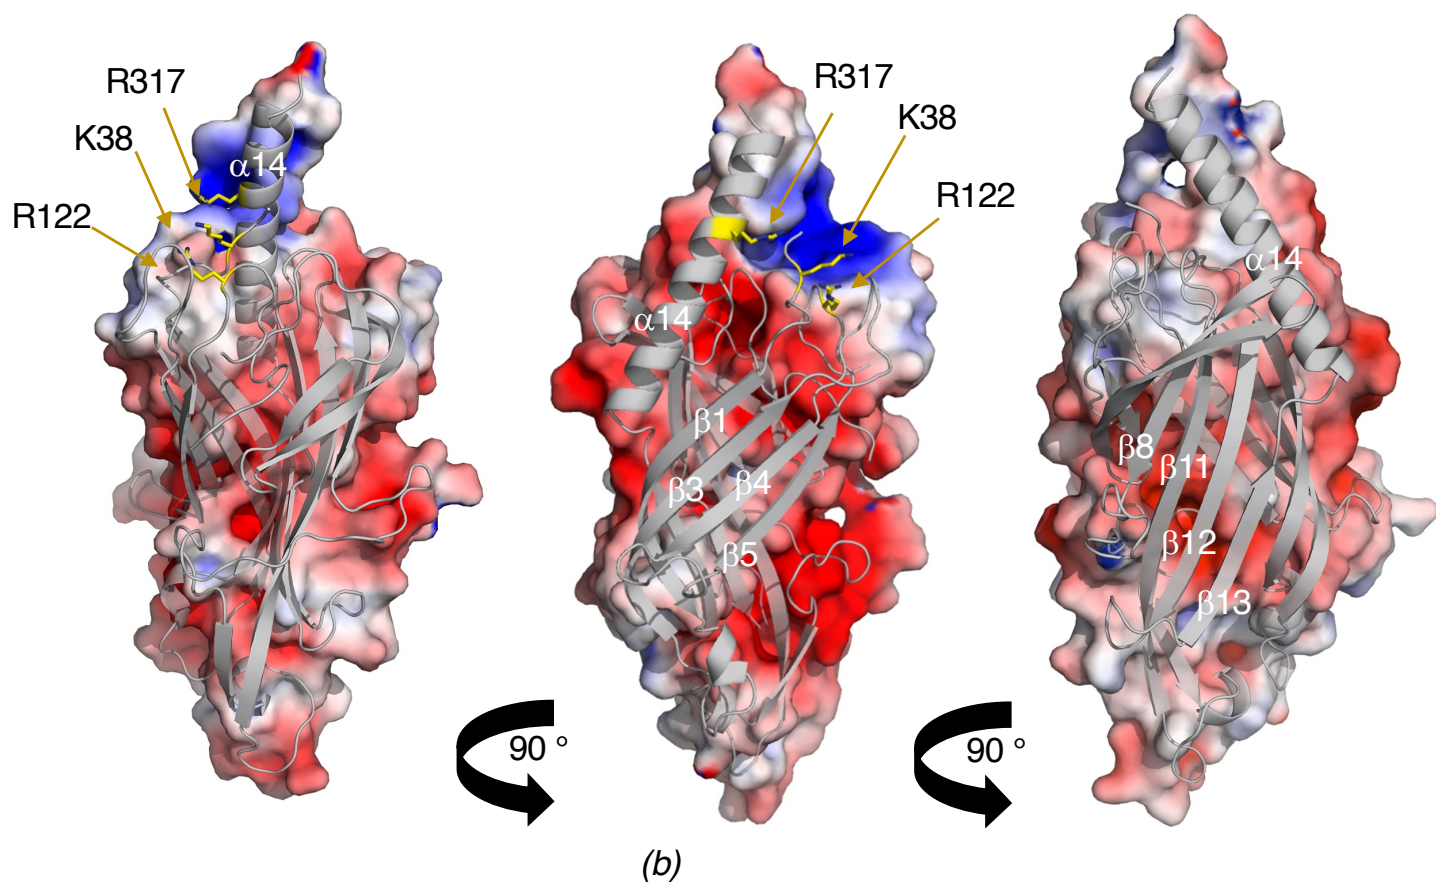

**Fig. S4.** (a) A close up of some beta strands to show hydrogen bond interactions (black dashed lines). (b) Electrostatic surface diagram generated using the APBS plugin in PyMOL. Positively charged residues are shown as yellow sticks.

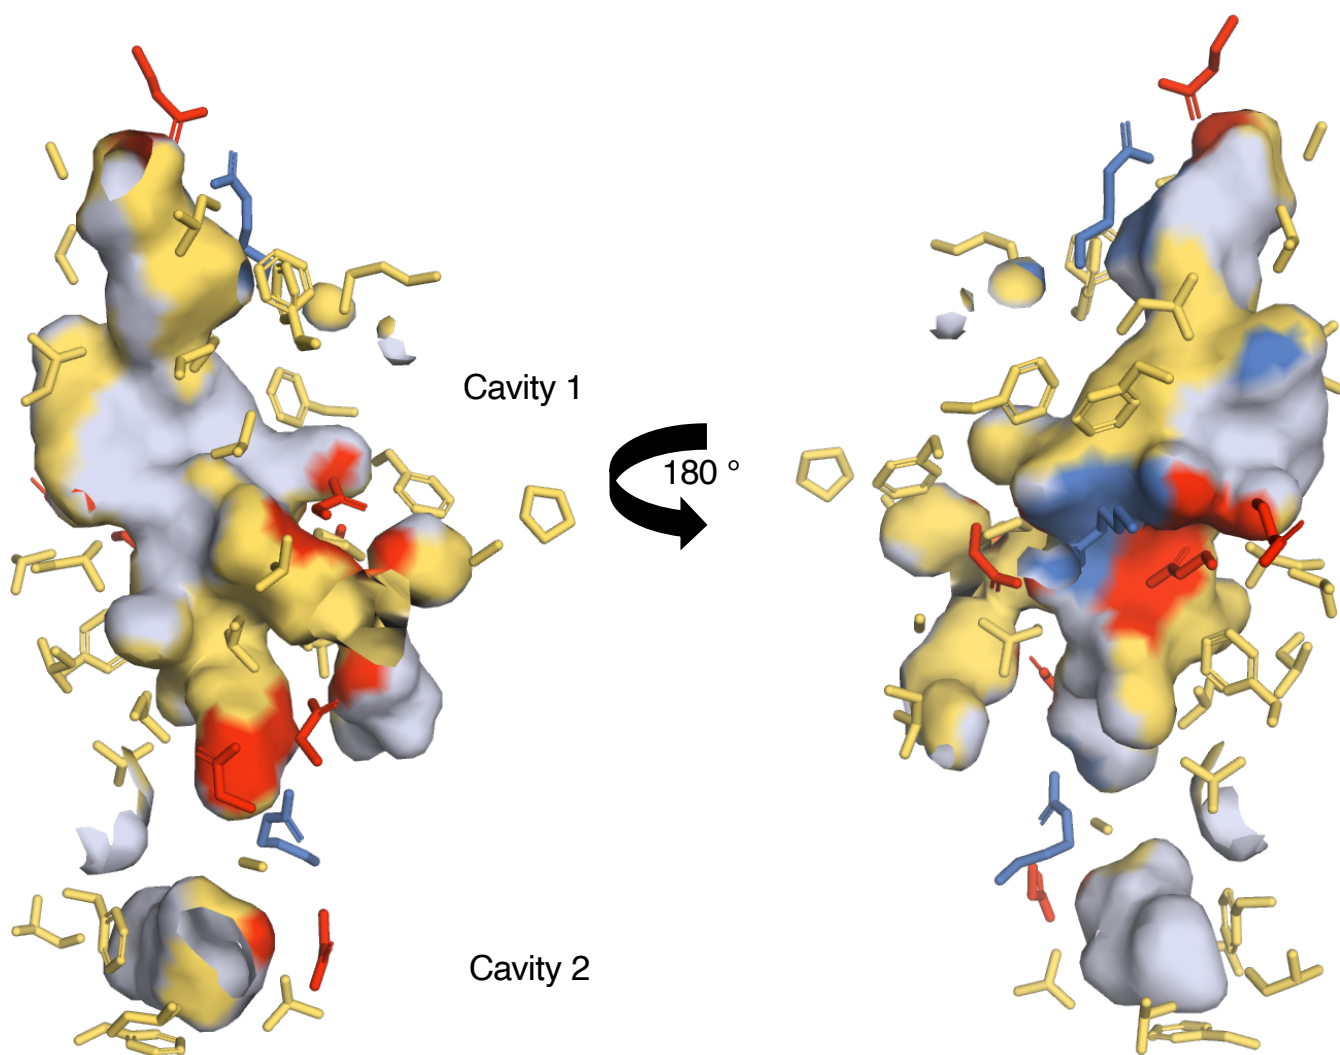

**Fig. S5.** (a) Residues surrounding the MSMEG\_0317 $\Delta$  cavities. Hydrophobic residues (Ala, Val, Leu, Ile, Pro, Phe, Gly, Met) are shown in yellow and charged residues are shown in blue (Lys, Arg) and red (Asp, Glu). The remaining surface represents polar residues (Gln, Asn, His, Ser, Thr, Tyr, Trp; residue side chains not shown in the figure for simplicity).

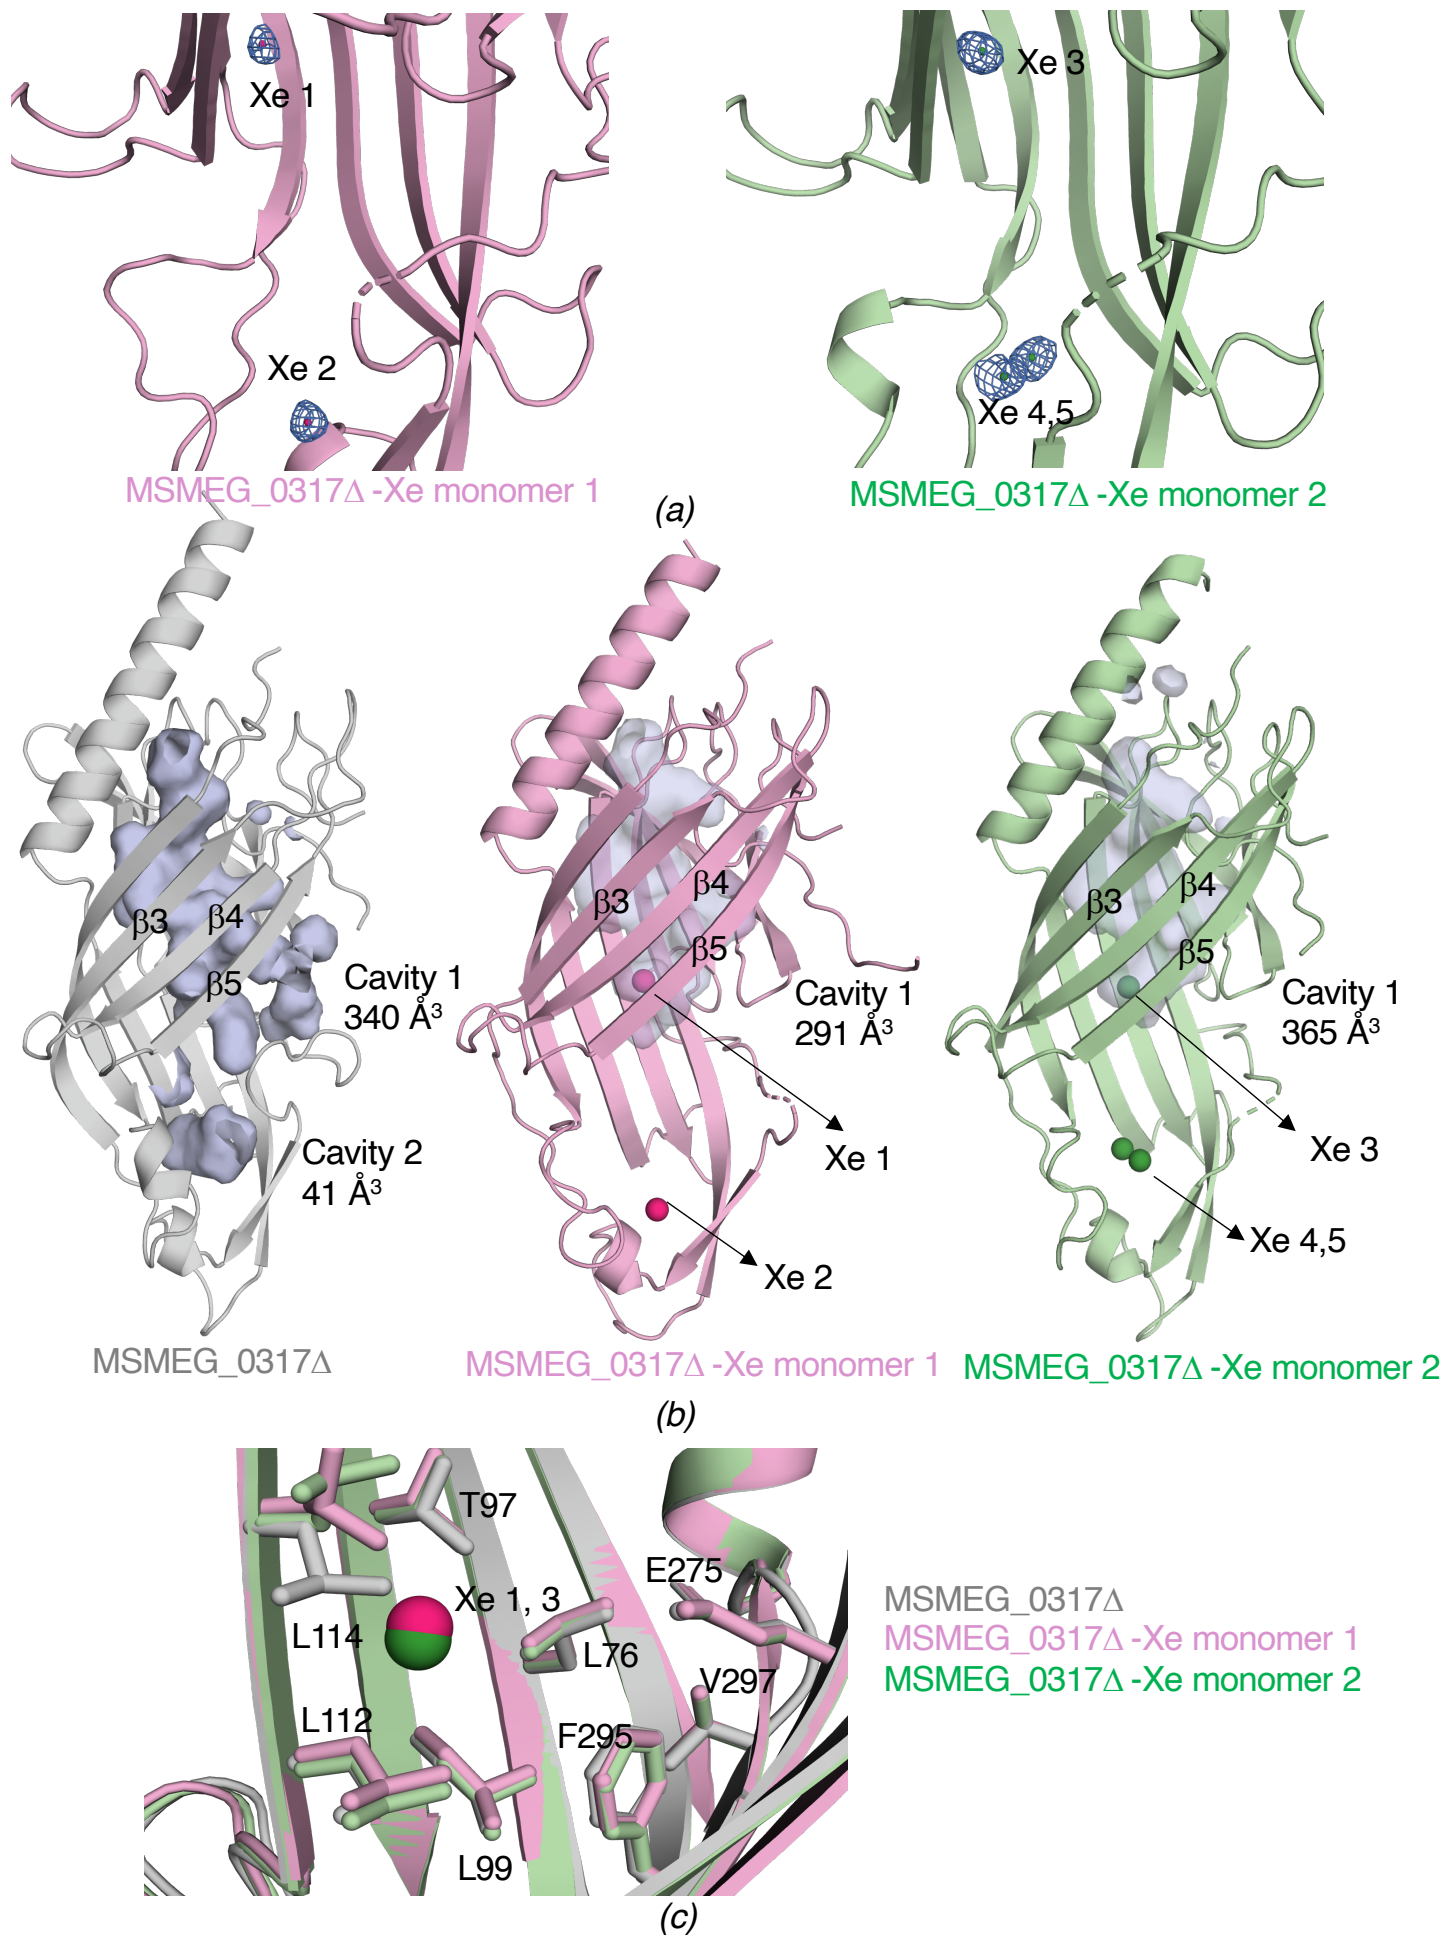

**Fig. S6.** (a) Anomalous electron density for xenons contoured at  $3\sigma$ . (b) Cavity comparison between MSMEG\_0317Δ and MSMEG\_0317Δ-Xe crystal structures. Position of xenon atoms is highlighted. (c) Overlay of monomer 1 and monomer 2 of MSMEG\_0317Δ-Xe with MSMEG\_0317Δ crystal structures near cavity 1.



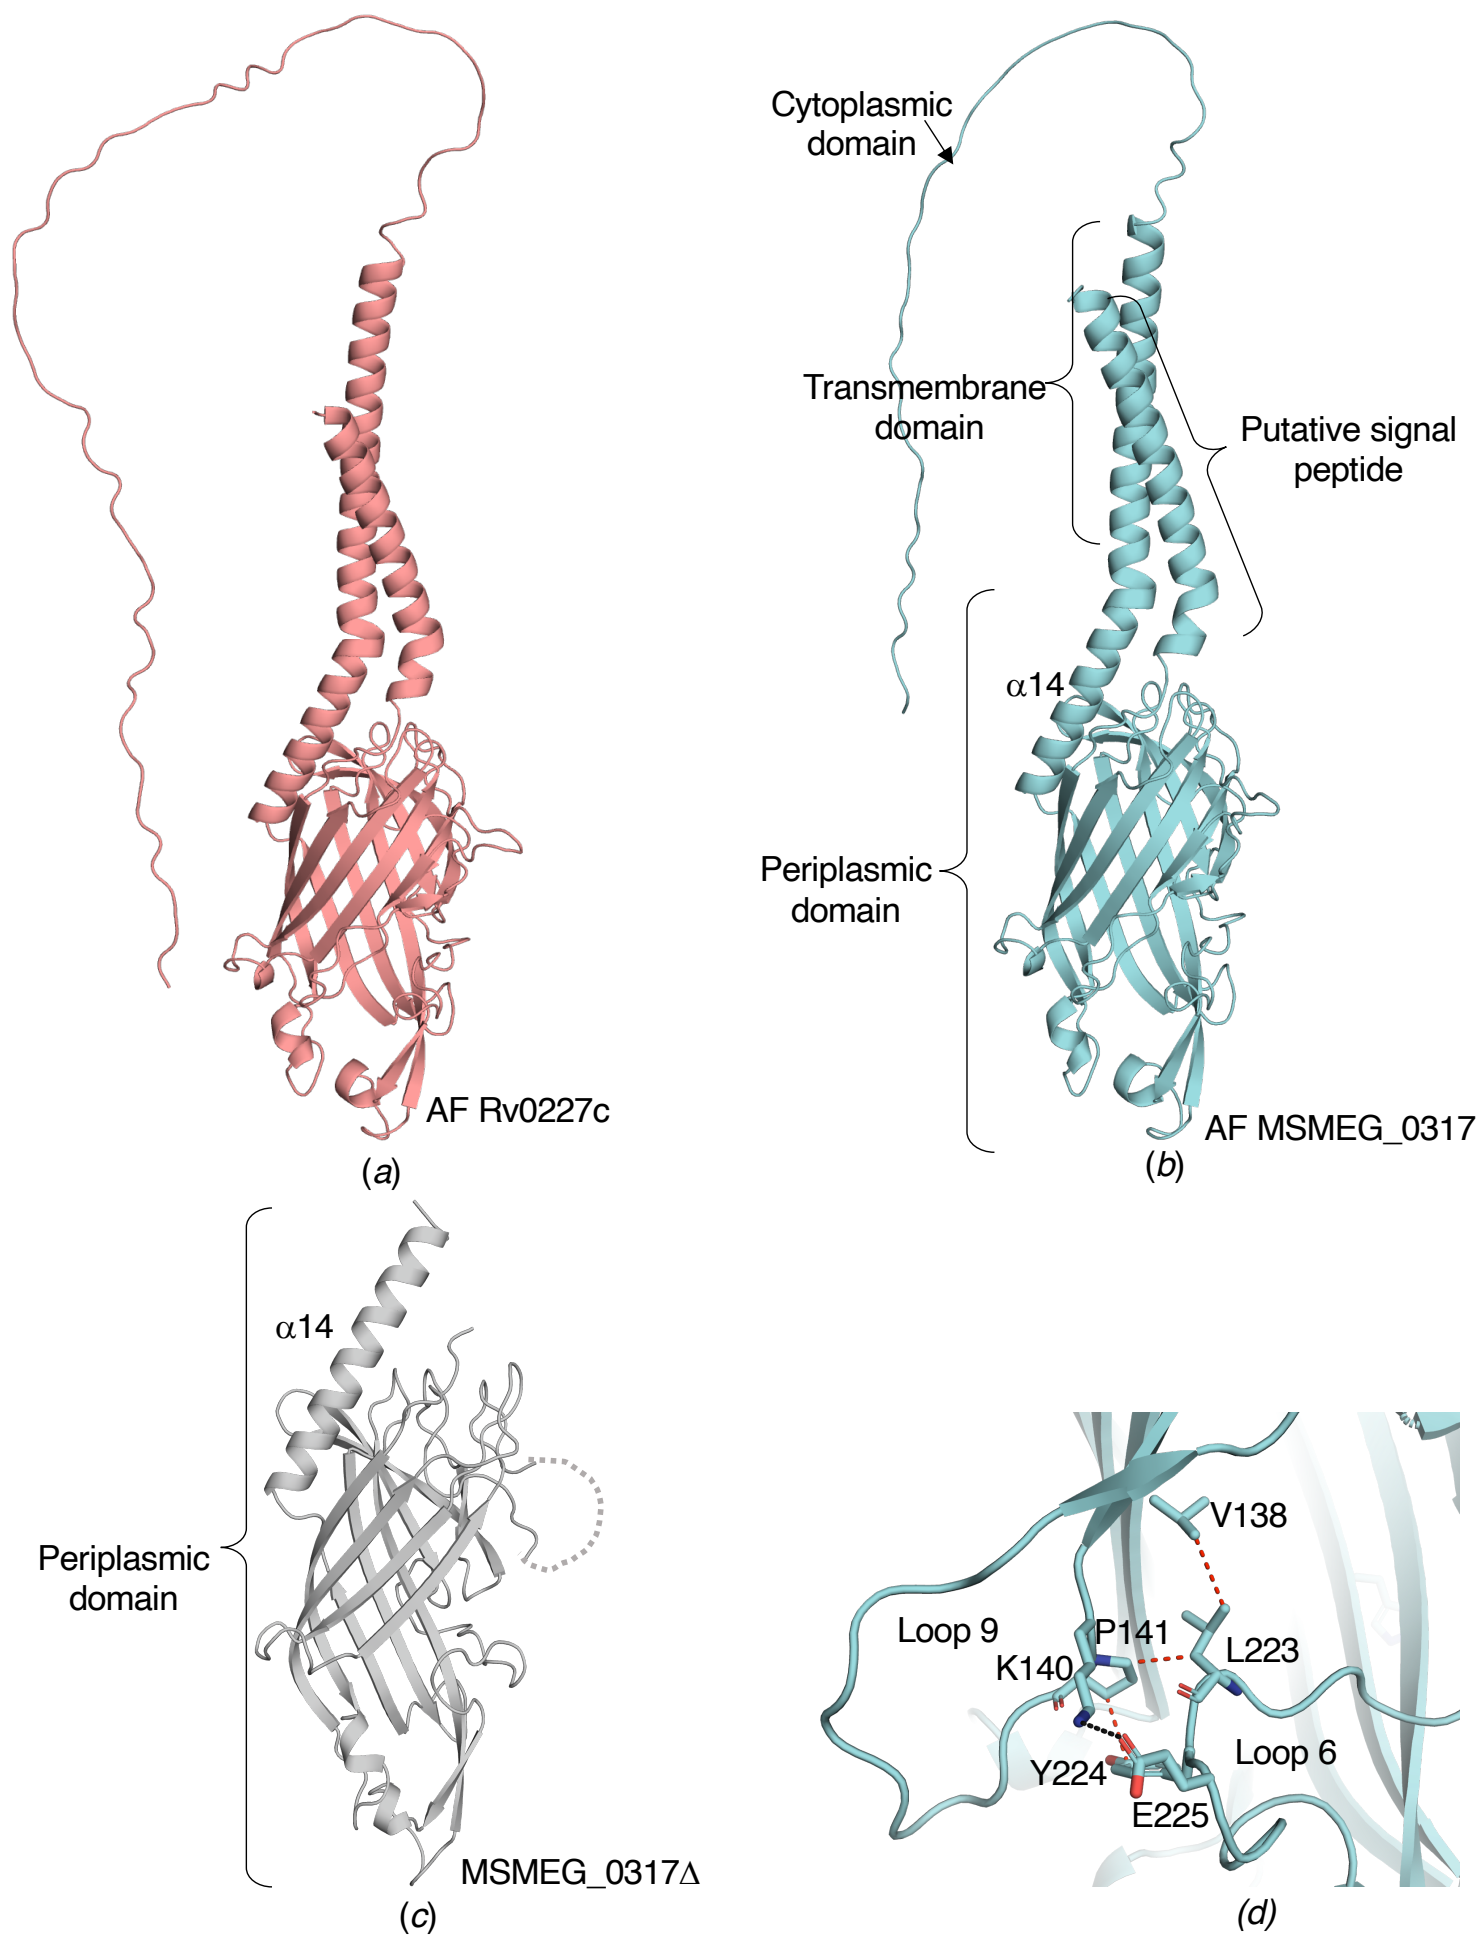

**Fig. S7.** (a) AlphaFold2 predicted full length structure of Rv0227c (AF Rv0227c). (b) AlphaFold2 predicted full length structure of MSMEG\_0317 (AF MSMEG\_0317). (c) The crystal structure of MSMEG\_0317 $\Delta$ . (d) Closeup view of the interaction between loop 6 and loop 9 in AF MSMEG\_0317. Salt bridge interaction is shown in black dashed lines and van der Waals interactions in red dashed lines.

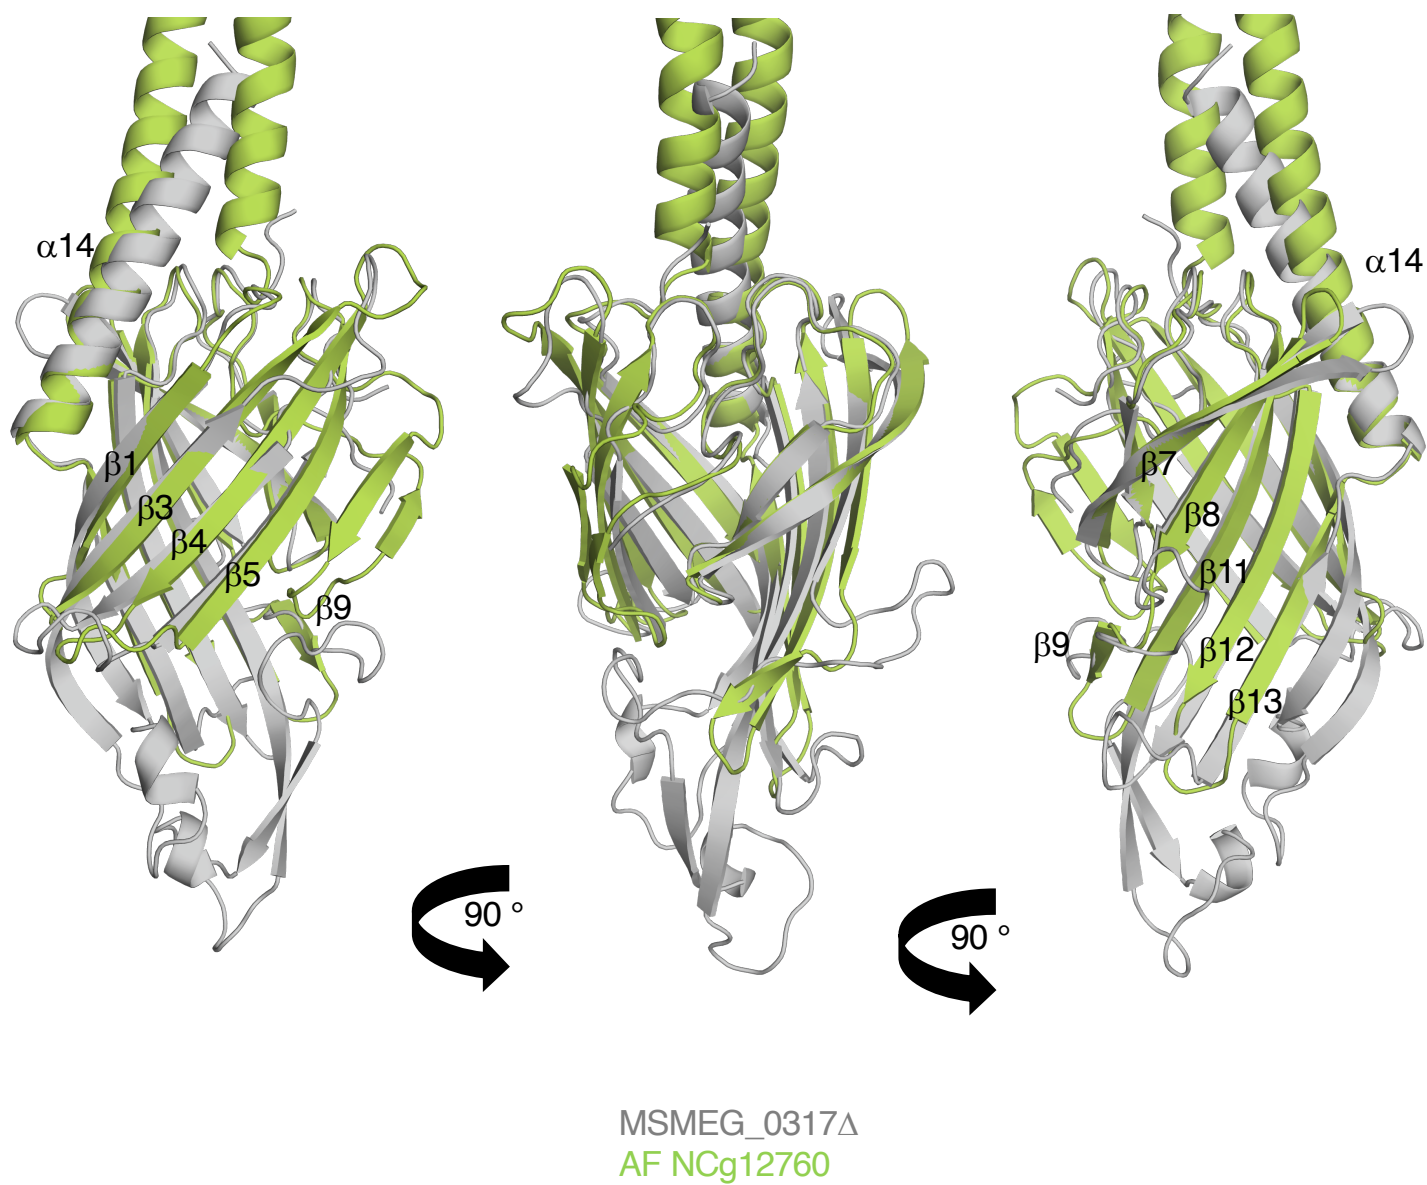

**Fig. S8.** Overlay of AlphaFold2 predicted structure of NCg12760 (AF NCg12760) with the crystal structure of MSMEG\_0317Δ, showing alignment of the core  $\beta$  strands. The  $\beta$  strands numbering is based on the MSMEG\_0317Δ crystal structure.

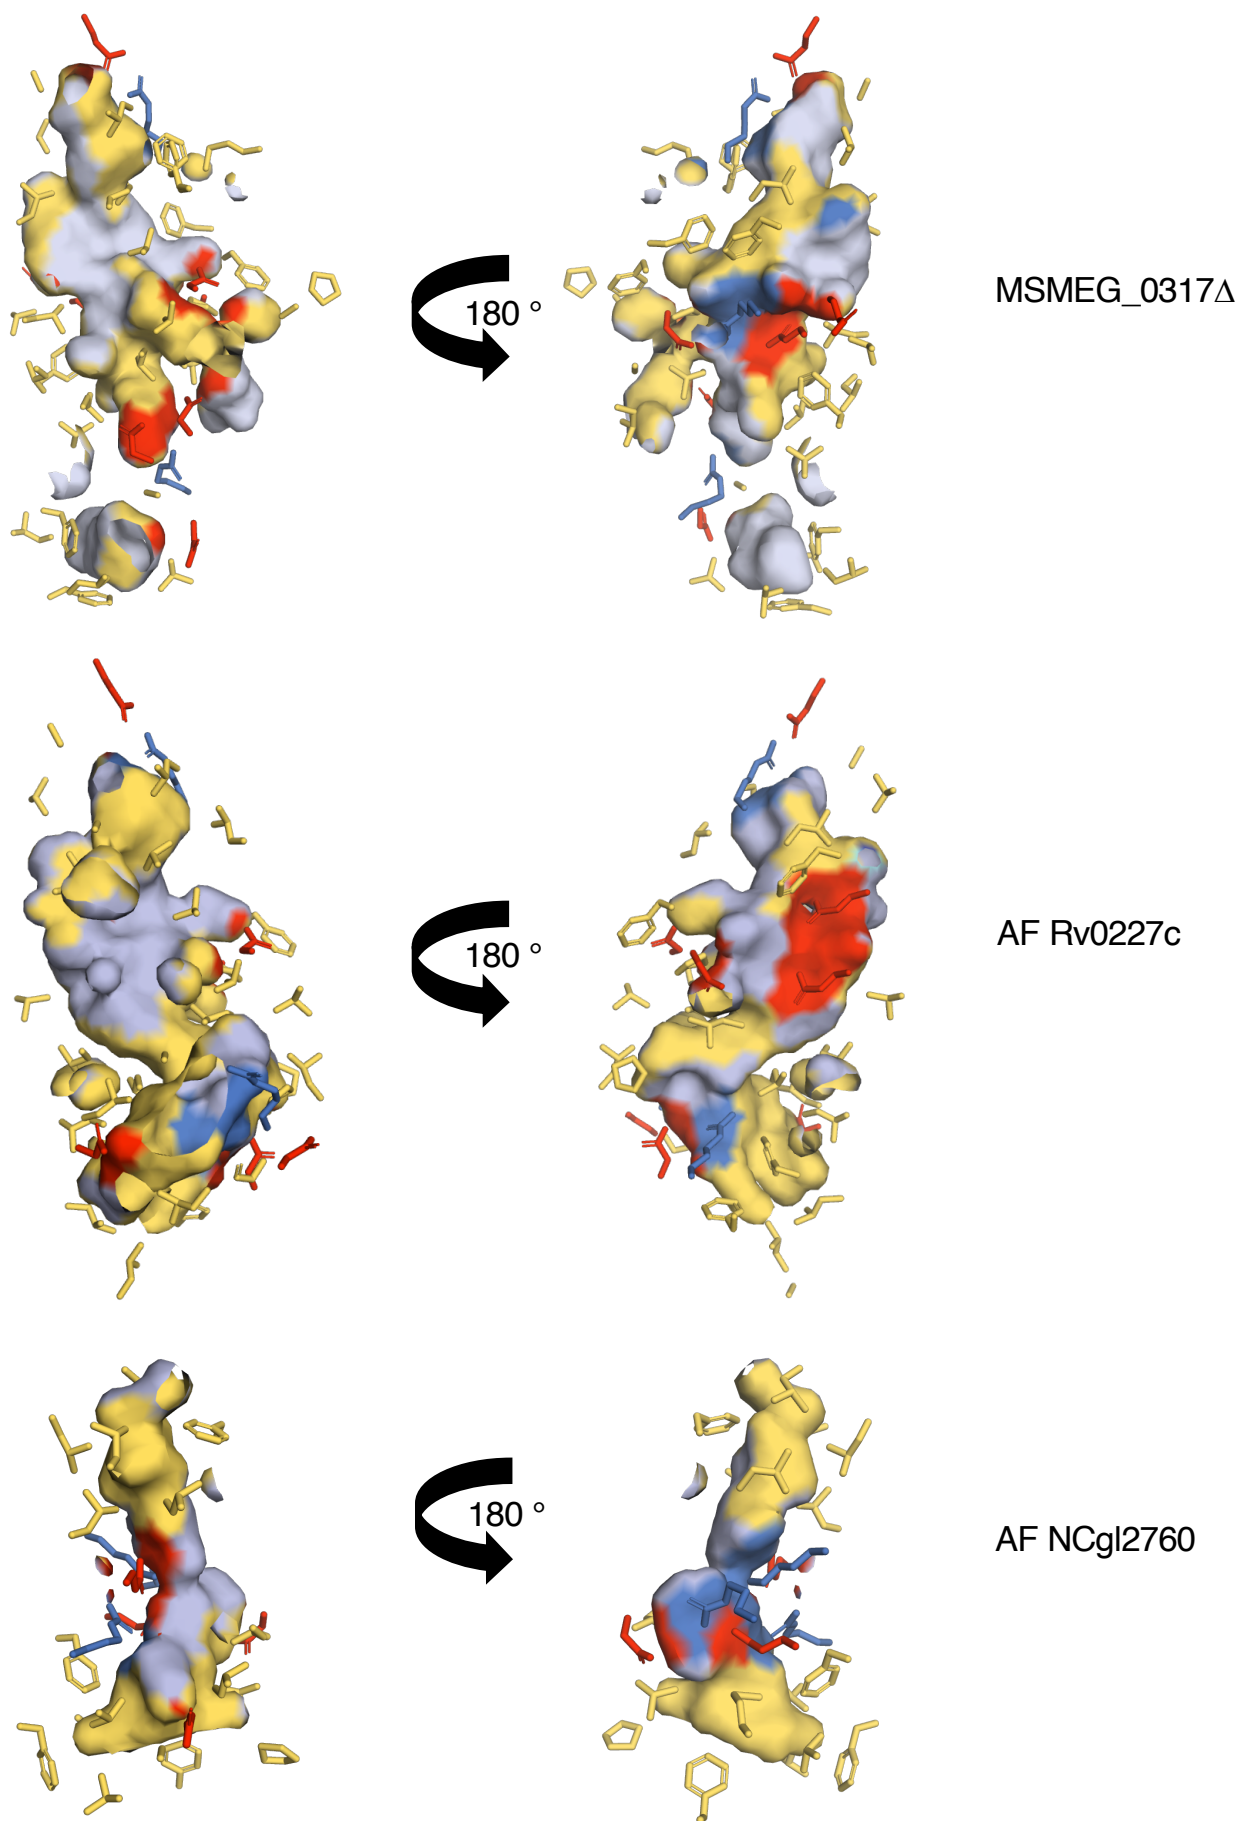

**Fig. S9.** Distribution of hydrophobic and charged residues surrounding the cavity in the MSMEG\_0317 $\Delta$  crystal structure, AlphaFold2-predicted Rv0227c (AF Rv0227c) and NCg12760 (AF NCg12760). Hydrophobic residues (Ala, Val, Leu, Ile, Pro, Phe, Gly, Met) are shown in yellow and charged residues are shown in blue (Lys, Arg) and red (Asp, Glu). The remaining surface represents polar residues (Gln, Asn, His, Ser, Thr, Tyr, Trp; residue side chains not shown in the figure for simplicity).
